# Supplementary material for: Clinical activity of durvalumab for patients with advanced mismatch repair-deficient and repair-proficient endometrial cancer. A nonrandomized phase 2 clinical trial
Source: PubMed Central journal article supplement — J Immunother Cancer. 2021 Jun 8;9(6):e002255. doi: 10.1136/jitc-2020-002255 (PMC8190057; doi:10.1136/jitc-2020-002255), 2021-06-08

### **PHAEDRA Supplementary materials**

Table S1: Best objective tumor response and disease control rates according to RECIST by MMR status

Figure S1: PFS according to RECIST by MMR status

Table S2: Numbers of participants with adverse events

Table S3: Completion rates of QLQ-C30 by MMR status

Table S4: Proportion of patients that improved in each QOL domain by MMR status

Table S5: QOL status at 3 and 6 months by MMR status

Figure S2: Pain symptom score (single item) by MMR status (higher is more symptoms)

Figure S3: Fatigue symptom score (single item) by MMR status (higher is more symptoms)

Figure S4: Nausea and vomiting symptom score (single item) by MMR status (higher is more symptoms)

Figure S5: Dyspnoea symptom score (single item) by MMR status (higher is more symptoms)

Figure S6: Diarrhoea symptom score (single item) by MMR status (higher is more symptoms)

**Table S1: Best objective tumor response and disease control rates according to RECIST by MMR status**

|                                                         | <b>MMR deficient<br/>(n=36)</b> | <b>MMR proficient<br/>(n=35)</b> |
|---------------------------------------------------------|---------------------------------|----------------------------------|
| <b>Best objective tumor response rate (OTRR)</b>        | 17<br>(47%; 95% CI: 32–63%)     | 1<br>(3%; 95% CI: 1–15%)         |
| <b>OTRR according to previous lines of chemotherapy</b> |                                 |                                  |
| None                                                    | 12 (57%)                        | 0 (0%)                           |
| One                                                     | 5 (38%)                         | 1 (5%)                           |
| Subsequent                                              | 0 (0%)                          | 0 (0%)                           |
| <b>Best response</b>                                    |                                 |                                  |
| Non evaluable                                           |                                 | 1 (3%)                           |
| CR                                                      | 5 (14%)                         |                                  |
| PR                                                      | 12 (33%)                        | 1 (3%)                           |
| SD                                                      | 6 (17%)                         | 10 (29%)                         |
| PD                                                      | 13 (36%)                        | 23 (66%)                         |
| <b>DCR (overall)</b>                                    | 23 (64%)                        | 11 (31%)                         |
| DCR at 16 weeks                                         | 21 (58%)                        | 9 (26%)                          |
| DCR at 24 weeks                                         | 18 (50%)                        | 7 (20%)                          |

**Figure S1: PFS according to RECIST by MMR status**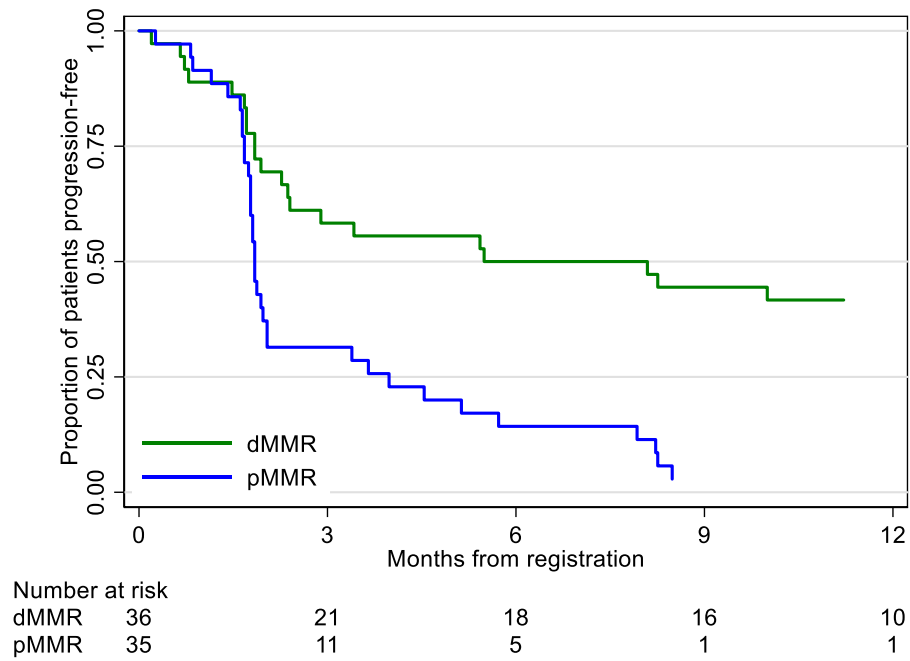

**Table S2: Numbers of participants with adverse events**

|                                                              | <b>Any grade</b> | <b>Grade 3-5</b> |
|--------------------------------------------------------------|------------------|------------------|
| Total participants who received at least one dose            | 69               | 69               |
| Any adverse event                                            | 64 (93%)         | 25 (36%)         |
| Events occurring in five or more patients:                   |                  |                  |
| Fatigue                                                      | 39 (57%)         | 1 (1%)           |
| Nausea                                                       | 23 (33%)         | 1 (1%)           |
| Constipation                                                 | 21 (30%)         | 1 (1%)           |
| General disorders and administration site conditions (Other) | 20 (29%)         |                  |
| Skin and subcutaneous tissue disorders (Other)               | 14 (20%)         |                  |
| Diarrhea                                                     | 14 (20%)         |                  |
| Pain                                                         | 12 (17%)         | 1 (1%)           |
| Urinary tract infection                                      | 10 (14%)         | 2 (3%)           |
| Vomiting                                                     | 10 (14%)         |                  |
| Anorexia                                                     | 9 (13%)          |                  |
| Dyspnea                                                      | 9 (13%)          |                  |
| Gastrointestinal disorders (Other)                           | 9 (13%)          | 1 (1%)           |
| Anemia                                                       | 8 (12%)          | 1 (1%)           |
| Hyperthyroidism                                              | 8 (12%)          |                  |
| Rash maculo-papular                                          | 8 (12%)          |                  |
| Abdominal pain                                               | 7 (10%)          | 3 (4%)           |
| Back pain                                                    | 7 (10%)          |                  |
| Cough                                                        | 7 (10%)          |                  |
| Hypothyroidism                                               | 7 (10%)          |                  |
| Other infections                                             | 6 (9%)           | 2 (3%)           |
| Musculoskeletal and connective tissue disorder (Other)       | 7 (10%)          |                  |
| Respiratory, thoracic and mediastinal disorders (Other)      | 6 (9%)           |                  |
| Upper respiratory infection                                  | 7 (10%)          |                  |
| Arthralgia                                                   | 5 (7%)           |                  |
| Headache                                                     | 5 (7%)           |                  |
| Nervous system disorders (Other)                             | 5 (7%)           |                  |
| Pruritus                                                     | 5 (7%)           |                  |

**Table S3: Completion rates of QLQ-C30 by MMR status\***

| <b>Time point</b> | <b>MMR Deficient</b> | <b>MMR Proficient</b> | <b>Overall</b> |
|-------------------|----------------------|-----------------------|----------------|
| Baseline          | 32/36 (89%)          | 33/35 (94%)           | 65/71 (92%)    |
| Month 1           | 31/32 (97%)          | 25/32 (78%)           | 56/64 (88%)    |
| Month 2           | 27/29 (93%)          | 12/19 (63%)           | 39/48 (81%)    |
| Month 3           | 20/24 (83%)          | 11/12 (92%)           | 31/35 (89%)    |
| Month 4           | 18/22 (82%)          | 9/10 (90%)            | 27/32 (84%)    |
| Month 5           | 17/21 (81%)          | 6/8 (75%)             | 22/29 (76%)    |
| Month 6           | 15/19 (79%)          | 7/7 (100%)            | 23/26 (88%)    |
| Month 7           | 17/19 (89%)          | 4/5 (80%)             | 21/24 (88%)    |
| Month 8           | 15/19 (79%)          | 5/5 (100%)            | 20/24 (83%)    |
| Month 9           | 14/18 (78%)          | 0/2 (0%)              | 14/20 (70%)    |
| Month 10          | 13/17 (76%)          | 0/1 (0%)              | 13/18 (72%)    |
| Month 11          | 11/16 (69%)          | 1/1 (100%)            | 12/17 (71%)    |

\*Forms are 'expected' until a patient progresses by iRECIST. Forms are considered completed if a global score can be obtained.

Improvement in QOL was defined as 2 or more visits with an improvement in that QOL measure of 10 points or more from baseline. This was calculated for each functioning QOL measure, but only for symptom scales Fatigue, Pain and Nausea and Vomiting as they are only composed of more than a single question. Patients that did not complete any QOL measures were considered to not improve.

**Table S4: Proportion of patients that improved in each QOL domain by MMR status**

| <b>Domain</b>                | <b>MMR Proficient</b> | <b>MMR Deficient</b> |
|------------------------------|-----------------------|----------------------|
| Global QOL                   | 3 (9%)                | 9 (25%)              |
| Physical functioning         | 2 (6%)                | 5 (14%)              |
| Role functioning             | 2 (6%)                | 10 (28%)             |
| Emotional functioning        | 2 (6%)                | 6 (17%)              |
| Cognitive functioning        | 3 (9%)                | 4 (11%)              |
| Social functioning           | 3 (9%)                | 13 (36%)             |
| Fatigue symptoms             | 5 (14%)               | 10 (28%)             |
| Pain symptoms                | 3 (9%)                | 12 (33%)             |
| Nausea and vomiting symptoms | 1 (3%)                | 5 (14%)              |

Compared to baseline, patients were categorized into decrease (10 points or more deterioration from baseline), stable (-9 to +9 inclusive), or increase (10 point or more improvement from baseline) at 3 and 6 months.

**Table S5: QOL status at 3 and 6 months by MMR status**

| Domain                   | QOL status<br>(compared to<br>baseline) | Month 3 |          | Month 6 |          |
|--------------------------|-----------------------------------------|---------|----------|---------|----------|
|                          |                                         | pMMR    | dMMR     | pMMR    | dMMR     |
| Global QOL               | Decrease                                | 3 (25%) | 5 (19%)  | 6 (38%) |          |
|                          | Stable                                  | 8 (67%) | 12 (46%) | 4 (67%) | 5 (31%)  |
|                          | Increase                                | 1 (8%)  | 9 (35%)  | 2 (33%) | 5 (31%)  |
| Physical<br>functioning  | Decrease                                | 2 (17%) | 8 (31%)  | 6 (35%) |          |
|                          | Stable                                  | 7 (58%) | 12 (46%) | 4 (67%) | 8 (47%)  |
|                          | Increase                                | 3 (25%) | 6 (23%)  | 2 (33%) | 3 (18%)  |
| Role functioning         | Decrease                                | 2 (17%) | 8 (31%)  | 5 (29%) |          |
|                          | Stable                                  | 8 (67%) | 9 (35%)  | 4 (67%) | 8 (47%)  |
|                          | Increase                                | 2 (17%) | 9 (35%)  | 2 (33%) | 4 (24%)  |
| Emotional<br>functioning | Decrease                                | 3 (25%) | 4 (15%)  | 1 (6%)  |          |
|                          | Stable                                  | 8 (67%) | 16 (62%) | 5 (83%) | 13 (76%) |
|                          | Increase                                | 1 (8%)  | 6 (23%)  | 1 (17%) | 3 (18%)  |
| Cognitive<br>functioning | Decrease                                | 5 (42%) | 7 (27%)  | 2 (33%) | 3 (18%)  |
|                          | Stable                                  | 5 (42%) | 18 (69%) | 2 (33%) | 12 (71%) |
|                          | Increase                                | 2 (17%) | 1 (4%)   | 2 (33%) | 2 (12%)  |
| Social<br>functioning    | Decrease                                | 2 (17%) | 6 (23%)  | 3 (18%) |          |
|                          | Stable                                  | 8 (67%) | 11 (42%) | 3 (50%) | 8 (47%)  |
|                          | Increase                                | 2 (17%) | 9 (35%)  | 3 (50%) | 6 (35%)  |

**Figure S2: Pain symptom score (single item) by MMR status (higher is more symptoms)**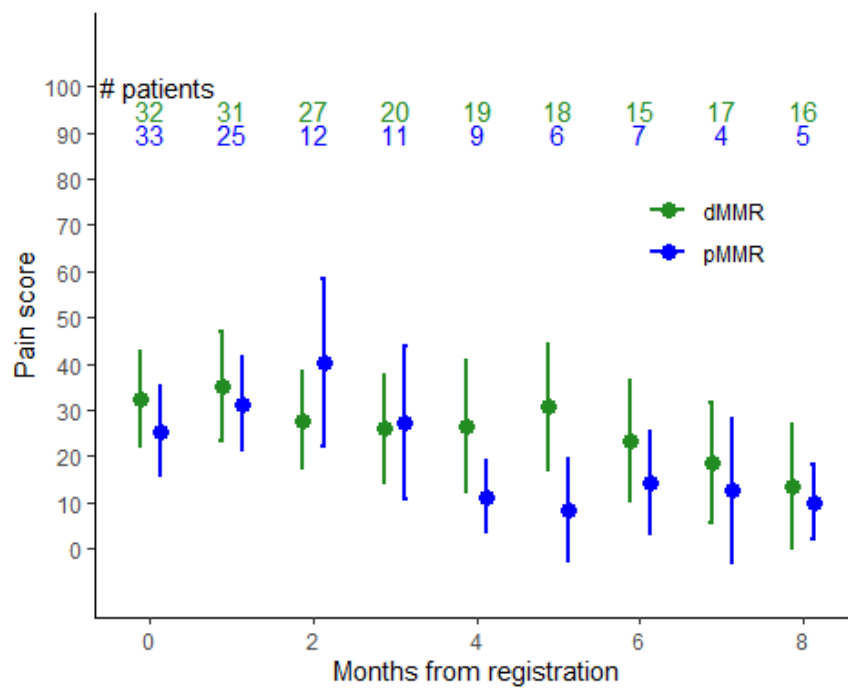



**Figure S3: Fatigue symptom score (single item) by MMR status (higher is more symptoms)**

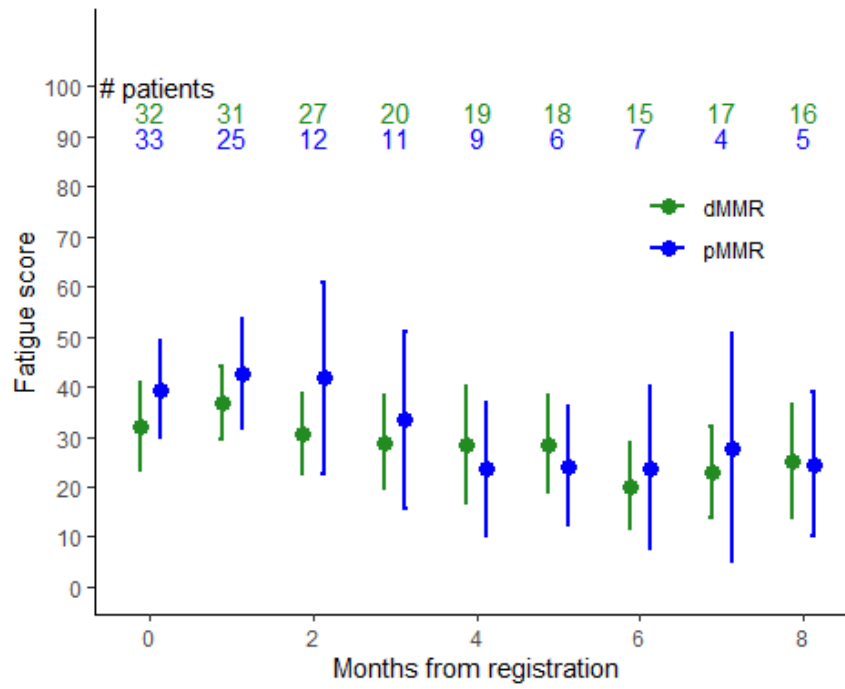

**Figure S4: Nausea and vomiting symptom score (single item) by MMR status (higher is more symptoms)**

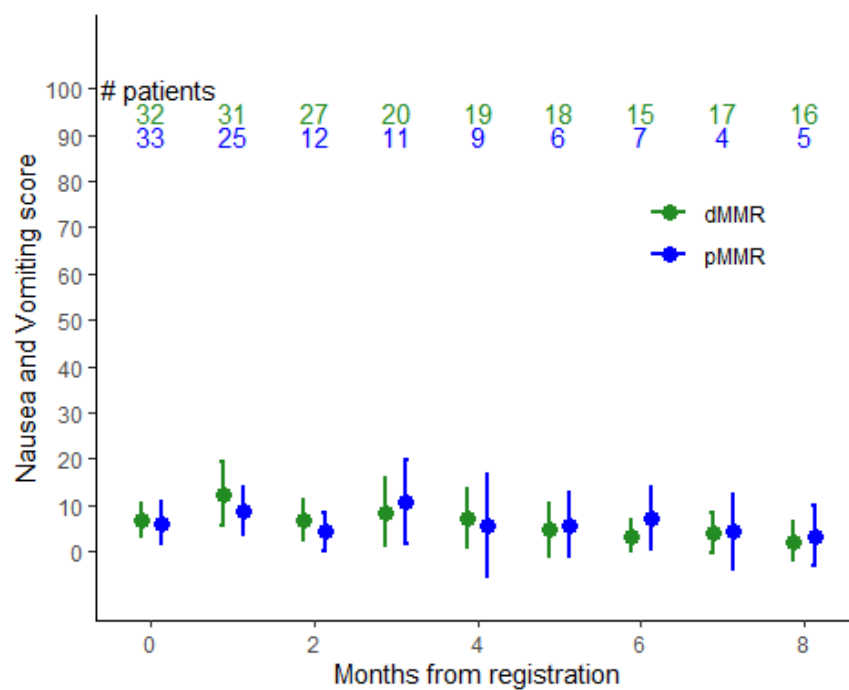

**Figure S5: Dyspnoea symptom score (single item) by MMR status (higher is more symptoms)**

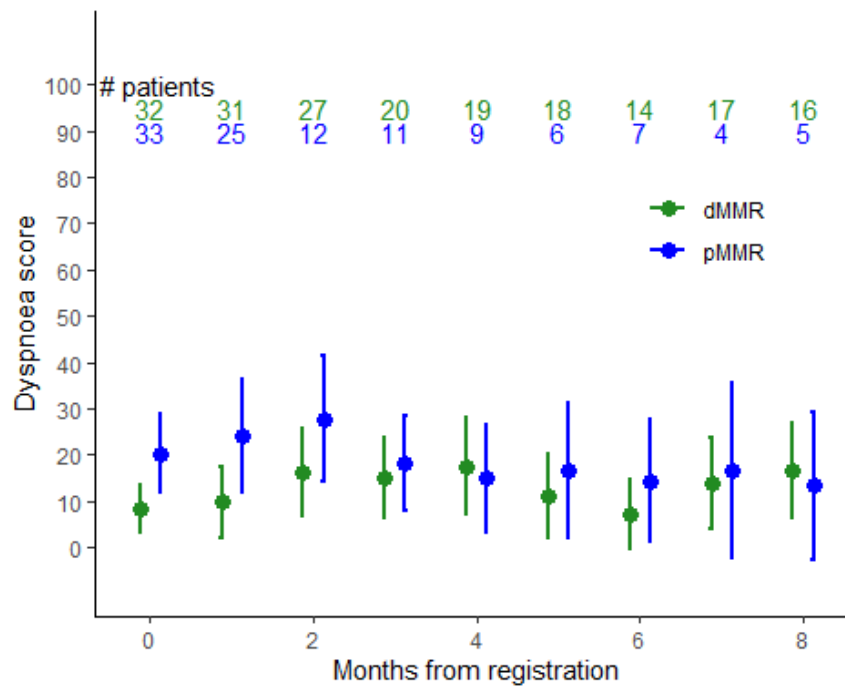

**Figure S6: Diarrhoea symptom score (single item) by MMR status (higher is more symptoms)**

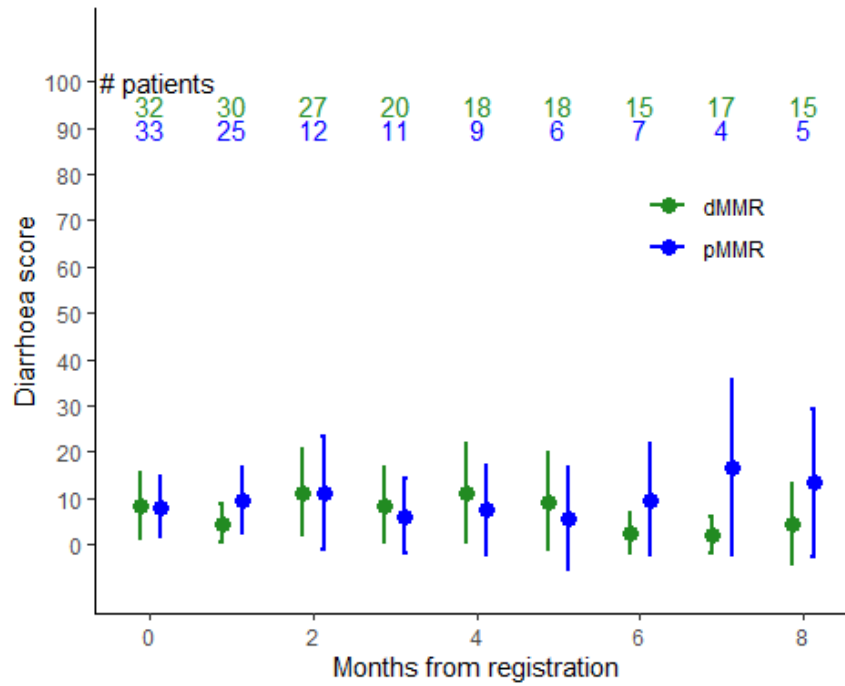

Supplement: jitc-2020-002255supp001.pdf [file jitc-2020-002255supp001.pdf]
